# Supplementary material
Source: PubMed Central journal article supplement (PMC3358879)
Supplement: 1201085109_pnas.201201085SI.pdf [file 1201085109_pnas.201201085SI.pdf]

# Supporting Information

Jia et al. 10.1073/pnas.1201085109

## SI Materials and Methods

Sequences of RNA oligonucleotides (duplex regions are underlined). Note that some sequences contain adenosines (marked A) and others do not (marked R).

R16 (top strand for 16-bp duplex substrates): 5'AGCACC-GUAAAGACGC3'

R16-bio (top strand for 16-bp duplex substrates, biotin with 9-carbon spacer at the 3'): 5'AGCACCGUAAAGACGC-C9-biotin3'

R16-dd (top strand for 16-bp duplex substrates, 2',3'-dideoxycytosine at the 3'): 5'AGCACCGUAAAGACGddC3'

R41(A) (bottom strand for 16-bp duplex with 25-nt A-rich single-stranded region): 5'GCGUCUUUACGGUGCUUAA-AACAAAACAAAACAAAACAAA3'

R41(R) (bottom strand for 16-bp duplex with 25-nt single-stranded region containing no A): 5'GCGUCUUUACG-GUGCUUGCCUGUUCGUGUCCUGUUGCUGCU3'

R22A(A) (bottom strand for 16-bp duplex with 6-nt A-rich single-stranded region): 5'GCGUCUUUACGGUGCUU-AAAA3'

R22(R) (bottom strand for 16-bp duplex with 6-nt single-stranded region containing no A): 5'GCGUCUUUACG-GUGCUUGCCUG3'

R21(A) (bottom strand for 16-bp duplex with 5-nt A-rich single-stranded region): 5'GCGUCUUUACGGUGCUUAAAA3'

R21(R) (bottom strand for 16-bp duplex with 5-nt single-stranded region containing no A): 5'GCGUCUUUACG-GUGCUUGCCU3'

R20(A) (bottom strand for 16-bp duplex with 4-nt A-rich single-stranded region): 5'GCGUCUUUACGGUGCUUAAA3'

R20(R) (bottom strand for 16-bp duplex with 4-nt single-stranded region containing no A): 5'GCGUCUUUACG-GUGCUUGCC3'

R17 (bottom strand for 16-bp duplex with one unpaired nucleotide): 5'GCGUCUUUACGGUGCUU3'

R36 (top strand for 36-bp duplex substrate): 5'AGCACC-GUAAAGACGCAAUCAUGCAGGGUCUGUCAG3'

R61 (bottom strand for 36-bp duplex with 25-nt single-stranded region): 5'CUGACAGACCCUGCAUGAUUGC-GUCUUUACGGUGCUUAAAACAAAACAAAACAAA-AAAA3'

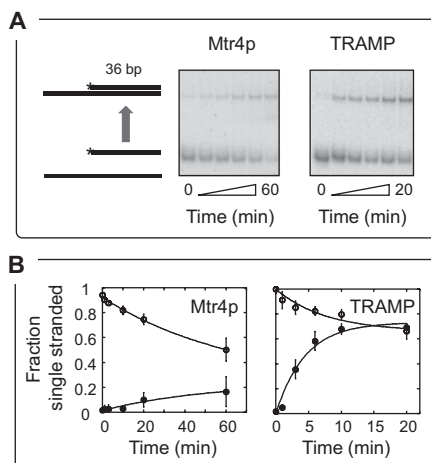

**Fig. S1.** Strand annealing activity by Mtr4p and Trf4/Air2/Mtr4 polyadenylation (TRAMP). (A) Representative PAGE of strand annealing reactions with the 36-bp duplex substrate. Annealing reactions were performed at temperature and buffer conditions identical to those for unwinding reactions. Duplex RNA substrates were denatured at 95 °C (3 min). Denatured single strands (0.5 nM final concentration) were incubated in reaction buffer for 5 min with 2 mM equimolar dATP and MgCl<sub>2</sub>. Annealing reactions were started by addition of 400 nM Mtr4p or TRAMP. Aliquots were removed after 1, 3, 10, 20, and 60 min with Mtr4p (Left), and after 1, 3, 6, 10, and 20 min with TRAMP (Right). Reactions were quenched with the same buffer used to stop unwinding reactions. Duplex and single-stranded RNAs were separated as described for unwinding reactions. No notable strand annealing was observed in the absence of TRAMP or Mtr4p (not shown). (B) Time courses for strand annealing reactions (○) of the substrate used in A (○) compared with time courses for unwinding reactions at identical conditions for Mtr4p (Left) and TRAMP (Right). Data points are averages from three independent experiments; error bars indicate one SD. Curves represent best fits to the integrated first-order rate law. For Mtr4p,  $A_{ann} = 0.70 \pm 0.15$ ,  $k_{obs, ann} = 0.02 \pm 0.01 \text{ min}^{-1}$ ; for TRAMP,  $A_{ann} = 0.35 \pm 0.06$ ,  $k_{obs, ann} = 0.13 \pm 0.05 \text{ min}^{-1}$ . Data for the unwinding reactions are from Fig. 2. For Mtr4p,  $Amp_{unw} = 0.224 \pm 0.102$ ,  $k_{obs, unw} = 0.02 \pm 0.02 \text{ min}^{-1}$ ; for TRAMP,  $Amp_{unw} = 0.733 \pm 0.057$ ,  $k_{obs, unw} = 0.22 \pm 0.05 \text{ min}^{-1}$ . For both Mtr4p and TRAMP, unwinding and strand annealing reactions reached similar amplitudes ( $Amp_{unw} + Amp_{ann} \sim 1$ ), indicating a steady state between unwinding and strand annealing that causes the reaction amplitude observed in Fig. 2.
